# Supplementary material for: Immune Responses Are Differentially Regulated by Root, Stem, Leaf, and Flower Extracts of Female and Male CBD Hemp (Cannabis sativa L.) Plants
Source: MDPI journal article supplement (doi:10.3390/immuno1040025), 2021-10-22
Supplement: s1 [file s1]

Archive with 1 entries (1 files):
- immuno-1358121-supplementary.pdf
