# Supplementary material for: Immune Responses Are Differentially Regulated by Root, Stem, Leaf, and Flower Extracts of Female and Male CBD Hemp (Cannabis sativa L.) Plants
Source: MDPI journal article supplement (doi:10.3390/immuno1040025), 2021-10-22

## Article

# Immune responses are differentially regulated by root, stem, leaf, and flower extracts of female and male CBD hemp (*Cannabis sativa* L.) plants

Laura G. A. Esposito <sup>1,2,3</sup>, Ezekial Overbaugh <sup>4</sup>, Jia Xiong <sup>3,5</sup>, Thirumurugan Rathinasabapathy <sup>3,6</sup>, Slavko Komarnytsky <sup>3,6</sup>, Derly José Henriques da Silva <sup>1</sup> and Debora A. Esposito <sup>3,5,\*</sup>

**Supplementary Figure S1.** HPLC-UV detection and full baseline resolution of (a) the cannabinoid standards mixture and (b) the exemplary hemp flower tissue extract. Shimadzu #220-91239-21 cannabinoid standards are shown in the order of polarity: cannabidivarin CBDV, cannabidiolic acid CBDA, cannabigerolic acid CBGA, cannabigerol CBG, cannabidiol CBD, tetrahydrocannabivarin THCV, cannabinol CBN, delta-9-tetrahydrocannabinol  $\Delta^9$ -THC, delta-8-tetrahydrocannabinol  $\Delta^8$ -THC, cannabichromene CBC, tetrahydrocannabinolic acid THCA. HPLC chromatograms were obtained using the Shimadzu Prominence LC-2030C workflow as described in: Komarnytsky S, Rathinasabapathy T, Wagner C, Metzger B, Carlisle C, Panda C, Le Brun-Blashka S, Troup JP, Varadharaj S (2021) Endocannabinoid System and Its Regulation by Polyunsaturated Fatty Acids and Full Spectrum Hemp Oils. Int J Mol Sci. 22(11):5479. doi: [10.3390/ijms22115479](https://doi.org/10.3390/ijms22115479). PMID: 34067450.

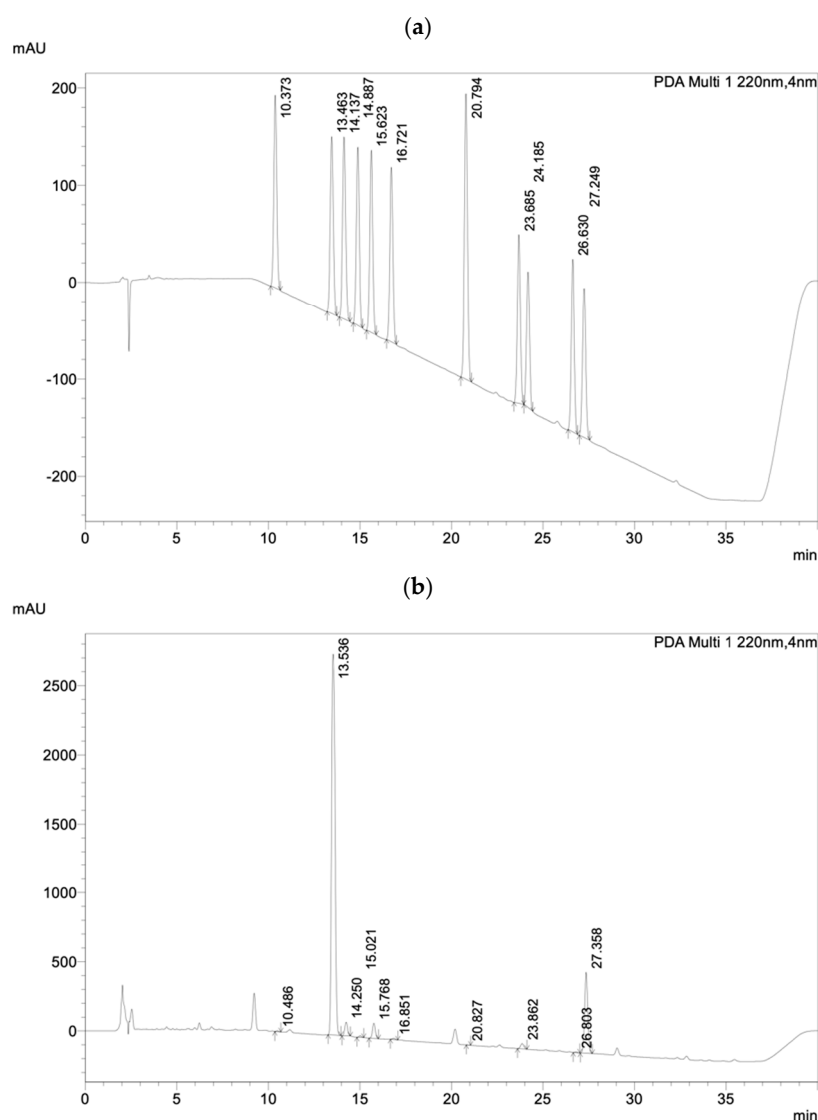

Supplement: s1 [file s1 › immuno-1358121-supplementary.pdf]
